# Case-Control Study on the Role of Enterotoxigenic *Bacteroides fragilis* as a Cause of Diarrhea among Children in Kolkata, India

Dharanidharan Ramamurthy, Gururaja P. Pazhani, Anirban Sarkar, Ranjan K. Nandy, Krishnan Rajendran, Dipika Sur, Bamkesh Manna, Thandavarayan Ramamurthy\*

National Institute of Cholera and Enteric Diseases, Kolkata, India

## Abstract

A total of 874 fecal specimens (446 diarrheal cases and 428 controls) from diarrheal children admitted in the Infectious Diseases Hospital, Kolkata and age and sex matched asymptomatic subjects from an urban community were assessed for the prevalence of enterotoxigenic *Bacteroides fragilis* (ETBF). Isolates of *B. fragilis* were tested for the presence of enterotoxin gene (*bft*) by PCR. The detection rate of ETBF was 7.2% (63 of 874 specimens) that prevailed equally in diarrheal cases and controls (7.2% each; 32 of 446 cases and 31 of 428 controls). Male children up to one year age group was significantly ( $p < 0.05$ ) associated with ETBF infection as compared to children  $> 2$  years of age in cases and controls. In 25 ETBF isolates, the *bft* gene was genotyped using PCR-RFLP and only two alleles were identified with prevalence rate of 40% and 60% for *bft-1* and *bft-3*, respectively. All the ETBF isolates were susceptible for chloramphenicol and imipenem but resistant to clindamycin (48%), moxifloxacin (44%) and metronidazole (32%). Resistance of ETBF to moxifloxacin (44%) and metronidazole is an emerging trend. Pulsed-field gel electrophoresis (PFGE) revealed that majority of the ETBF isolates are genetically diverse. In the dendrogram analysis, two clusters were identified, one with ETBF resistant to 5–8 antimicrobials and the other cluster with metronidazole and moxifloxacin susceptible isolates from diarrheal cases. To our knowledge, this is the first detailed report on ETBF from India indicating its clinical importance and molecular characteristics.

**Citation:** Ramamurthy D, Pazhani GP, Sarkar A, Nandy RK, Rajendran K, et al. (2013) Case-Control Study on the Role of Enterotoxigenic *Bacteroides fragilis* as a Cause of Diarrhea among Children in Kolkata, India. PLoS ONE 8(4): e60622. doi:10.1371/journal.pone.0060622

**Editor:** Deepak Shukla, University of Illinois at Chicago, United States of America

**Received:** January 18, 2013; **Accepted:** February 28, 2013; **Published:** April 5, 2013

**Copyright:** © 2013 Ramamurthy et al. This is an open-access article distributed under the terms of the Creative Commons Attribution License, which permits unrestricted use, distribution, and reproduction in any medium, provided the original author and source are credited.

**Funding:** This study was supported by grants from Global Enteric Multicentric Study, University of Maryland, Baltimore, USA, and Indian Council of Medical Research (ICMR), India. AS is a recipient of Junior Research Fellowship from the National Academy of Sciences, Allahabad, India. The funders had no role in study design, data collection and analysis, decision to publish, or preparation of the manuscript.

**Competing Interests:** The authors have declared that no competing interests exist.

\* E-mail: tramu@vsnl.net

## Introduction

The *Bacteroides* species are a group of Gram-negative anaerobes, which generally represent as a major constituent of the human gut microbiota. Although *Bacteroides* species play an important role in mediating mucosal and systemic immunity, this group sometimes cause opportunistic infections. *Bacteroides fragilis* is the only known species of the *Bacteroides* that can cause diarrhea and frequently isolated from abscesses, soft tissue infections and bacteremia [1]. *B. fragilis* does not have other known niches except the gut of mammals [2]. A study conducted in southern India showed that *B. fragilis* was frequently detected in humans with and without diarrhea [3]. In India, this pathogen has been identified in different clinical specimens and also in healthy persons but its virulence factors are not confirmed [4]. *B. fragilis* is categorized into two subgroups: non-enterotoxigenic *B. fragilis* (NTBF) and enterotoxigenic *B. fragilis* (ETBF). In developing countries, ETBF is an emerging pathogen associated with diarrhea in children and travelers [5–7]. In children, ETBF is associated with secretory diarrhea with mild severity and hence much attention has not been paid to this pathogen. The other syndromes of ETBF associated infection include extraintestinal infections, abdominal pain, tenesmus, inflammatory diarrhea, antibiotic associated

diarrhea and chronic inflammation that lead to colon cancer [8–11].

ETBF produces a specific virulence factor known as fragilysin, which is a heat-labile enterotoxin responsible for mucosal inflammation. Based on the sequence variation in the *B. fragilis* enterotoxin encoding gene *bft*, three subtypes namely *bft-1*, *bft-2*, and *bft-3* have been identified and these are predominantly found in specific geographical locations [10]. Several methods have been reported for the diagnosis of ETBF including conventional culture technique, cell culture assay, enzyme immunoassays, immunomagnetic separation followed by PCR (IM-PCR), and nested PCR [10]. Among these methods, nested PCR has been considered as a most simple and sensitive method [10,11]. As this pathogen is associated with a wide variety of infections, information regarding its prevalence and characterization are important for the successful clinical management.

In India, only few studies have been made to detect ETBF associated with diarrhea or among non-diarrhea patients [3,4,6,12]. This study was undertaken to detect the prevalence of ETBF among children with diarrhea admitted in the Infectious Diseases Hospital (IDH), Kolkata and without diarrhea from an urban community. In addition, phenotypic and genotypic characteristics of the ETBF were also investigated.

## Materials and Methods

### Study populations and sample collection

From February to August 2012, 874 fecal specimens collected from children below five years of age were processed. Of these, 446 fecal specimens were obtained from diarrheal children treated in the IDH and 428 samples of age and sex matched asymptomatic controls from an urban community. Before the initiation of antimicrobial therapy, the stool specimens were collected from these children. The children admitted in the hospital were treated with intravenous fluid (IVF) or oral rehydration solution (ORS) depends on the nature of dehydration and oral ciprofloxacin (6–10 mg per Kg of the body weight) and metronidazole (35–50 mg per Kg) was given in divided doses. After microbial screening, aliquots of the fecal specimens were stored at  $-80^{\circ}\text{C}$  for subsequent use.

### Extraction of total nucleic acid from fecal specimens

Fecal specimens ( $\sim 100$  mg semi solid or 200  $\mu\text{l}$  if liquid) were suspended in nuclease free water (final concentration  $\sim 10\%$ ) with equal volume of vortex XF (Miller-Stephenson Chemical Co, Inc, Danbury, CT) and vortexed for 2 min followed by centrifugation at 4500 rpm for 10 min. Two hundred micro liters of the supernatant was used for extraction of the total nucleic acid using an automated system (NucliSens EasyMAG; bioMérieux, Marcy l'Etoile, France).

### Culture and confirmation of ETBF

Stool specimens collected from patients and controls were transported to the laboratory within 2 hrs of collection in a cold chamber maintained at  $4^{\circ}\text{C}$ . The fecal specimens were streaked on to respective selective agars for isolation of vibrios, *Salmonella* spp, *Shigella* spp, *Campylobacter* spp, and *Aeromonas* spp and identified these pathogens as described before [13]. Three different *Escherichia coli* colonies from MacConkey agar were tested for different pathogroups by multiplex PCR [13]. For the isolation of *Bacteroides* species, Bile-Esculin (BBE) agar (Becton, Dickinson and Company, Sparks, MD) plate was used and incubated at  $37^{\circ}\text{C}$  for 48 hrs in an anaerobic jar (BD GasPak EZ anaerobic systems). After incubation, several individual gray, raised circular colonies surrounded by esculin hydrolyses from each specimen was subcultured on Colombia blood agar (CBA) plate (bioMérieux) and incubated anaerobically for 48 hrs. A portion of pure culture from the blood agar was suspended in an anaerobic broth [Luria Broth supplemented with beef extract (0.3%), cysteine HCl (0.04%), glucose (0.1%) sodium hydrogen phosphate (0.4%) and glycerol (15%)] and preserved at  $-80^{\circ}\text{C}$ . The remaining portion of the culture was suspended in TE buffer for the confirmation of ETBF by PCR. In addition to culture methods, ELISA was performed to detect rotavirus, adenovirus, and parasites such as *Giardia lamblia*, *Cryptosporidium* spp. and *Entamoeba histolytica* directly from the stool specimens [13]. *Helicobacter pylori* in the stools were detected using a commercial ELISA kit (Amplified IDEIA™ HPStAR, Oxoid, Basingstoke, Hants, UK). The DNA extracted from the stool specimens were used for the detection of Astro virus, Sapovirus, and Norovirus (Genotype I and Genotype II) by reverse transcriptase PCR [13].

### Detection of *B. fragilis* and ETBF by PCR

The pure cultures of *Bacteroides* from CBA plates were suspended in a TE buffer and boiled for 15 min in the water bath, snap cooled on ice and centrifuged at 10,000 rpm for 5 min. The resulting supernatants were screened for the 16S-rRNA gene-specific for *B. fragilis* group and *bft* by PCR [14,15]. In addition,

the total nucleic acid extracted from the fecal specimens was tested for the presence of *bft* by PCR.

### Genotyping of *bft*

From the 63 ETBF positive stool specimens by PCR, 30 ETBF were isolated by culture method. Due to non-viability of 5 isolates, only 25 isolates harboring *bft* was amplified by PCR and restriction fragment length polymorphism technique (RFLP) was applied to detect the *bft* subtypes [16]. The PCR amplified products were purified using QIAquick PCR purification kit (QIAGEN, GmbH, Hilden, Germany) and then digested with *Sau3A1* (Thermo Scientific Inc., Waltham, MA) according to the manufacturer's recommendations. The digested DNA was separated in a 2% agarose gel, and visualized after ethidium bromide staining.

### Antimicrobial susceptibility testing

ETBF isolates were grown on CBA and suspended in sterile saline and the cell density was determined using a densitometer (bioMérieux), which is equivalent to a 1.0 McFarland standard ( $\sim 3 \times 10^8$  CFU/mL). The cell suspension was spread uniformly on the Brucella blood agar (BBA, Oxoid, Basingstoke, UK) supplemented with 5% laked sheep blood, hemin, and vitamin K according to CLSI guidelines [17]. After the inoculation, E-test strips (AB Biodisk-bioMérieux) for each drug (amoxicillin-clavulanic acid, AMC; ampicillin, AMP; ampicillin-sulbactam, SAM; cefoxitin, FOX; chloramphenicol C; ciprofloxacin, CIP; clindamycin, CLI; imipenem, IPM; moxifloxacin, MXF; norfloxacin, NOR; and metronidazole, MTZ) was placed and incubated for 48 hrs at  $37^{\circ}\text{C}$  in an anaerobic atmosphere. Reference strain *B. fragilis* ATCC 25285 was used as control. Resistant and susceptibility of ETBF were estimated according to quality control ranges for *B. fragilis* assigned by the manufacturer's instruction and also using breakpoints information of CLSI and other reports [17–19].

### Pulse Field Gel Electrophoresis (PFGE)

PFGE protocol described by Yamasaki et al. [20] was slightly modified and adopted in this study. Briefly, 25 ETBF isolates were anaerobically grown for 14–18 hrs on CBA plates at  $37^{\circ}\text{C}$ . Bacterial cultures were suspended in cell suspension buffer (CSB; 10 mM Tris-HCl (pH 7.2), (20 mM NaCl) (50 mM EDTA [pH 8.0]) using sterile cotton swabs. Cells were harvested by centrifugation, washed and resuspended in CSB and adjusted to an optical density of 1.0 to 1.2 at 610 nm. The cell suspension (500  $\mu\text{l}$ ) was mixed with (500  $\mu\text{l}$ ) molten low melting agarose (2%) at  $50^{\circ}\text{C}$ . The mixture was carefully dispensed into a sample mold (Bio-Rad, Hercules, CA). After solidification, the plugs were transferred to a 2.0-ml micro centrifuge tubes containing 1.0 ml of cell lysis buffer (1 mg/ml lysozyme, 10 mM Tris-HCl (pH 7.2) 50 mM NaCl, 0.2% sodium deoxycholate and 0.5% of sodium laurylsarcosine) and incubated at  $37^{\circ}\text{C}$  for 3 hrs. After incubation, plugs were washed twice with reagent grade water and treated with 1 ml of proteinase K solution (1 mg/ml proteinase K, 100 mM EDTA (pH 8.0) 0.2% sodium deoxycholate and 1% of sodium laurylsarcosine) at  $50^{\circ}\text{C}$  for overnight. The plugs were washed with washing buffer (10 mM Tris-HCl and 50 mM EDTA [pH 8.0]) two times for one hr, once with phenylmethylsulfonyl fluoride (1 mM) containing wash buffer and twice with diluted wash buffer (0.1X) with agitation at room temperature.

The agarose-embedded ETBF DNA plugs were digested with 50 U of *NotI* enzyme (New England Biolabs Inc., Ipswich, MA) and *Salmonella enterica* serovar Braenderup (H9812) was digested by *XbaI* and its DNA fragments were used as molecular size markers. The digested DNA fragments were resolved with 1% PFGE-grade

agarose (SeaKem Gold agarose, Lonza, Rockland, ME) in 0.5X trisborate EDTA buffer at 6 V/cm for 16 hrs at 14°C. Run conditions were generated by the autoalgorithm mode of the CHEF Mapper PFGE system (Bio-Rad) with a size range of 30–600 kb. After electrophoresis, the ethidium bromide (Sigma, St. Louis, MO) stained agarose gel was visualized and the captured images were digitized for computer-aided analysis (Gel Doc system, Bio-Rad). PFGE profiles were analyzed using the BioNumerics version 4.0 software (Applied Maths, Sint Martens Latem, Belgium). The tagged image file formats were normalized by using the universal *Salmonella enterica* serotype Braenderup (H9812) size standard on each gel against the reference in the database. PFGE profiles were matched using the Dice coefficient and unweighted pair group method using arithmetic averages (UPGMA) clustering with a 1.5% band position tolerance window and 1.5% optimization. The clustering of the PFGE patterns and band assignments were verified visually.

### Statistical Analysis

The inferential age groups were evaluated for ETBF positive specimens from under five years children by Multinomial Logistic Regression (MLR)(1,2) analysis using SPSS software (Version 19.0, SPSS Inc., Chicago, Illinois). The age groups were classified into 3 categories: ≤1 year, >1–2 years and >2 years and coded as 1–3, respectively. The relationship between the risk dependent variable and each of the categorical explanatory variables are shown in Table 1. Infection caused by a ETBF was classified in number as ‘1’ for organism present and ‘2’ for its absence. The extreme values of the classified age group was fixed as reference category (>2 yrs).

### Ethics Statement

Ethical approval was obtained from the National Institute of Cholera and Enteric Diseases Ethics Committee (Ref.C-48/2012-T&E), and parents of the children gave written informed consent.

**Table 1.** Multinomial Logistic Regression Models exploring significant risk age group of ETBF infection.

|                 | Age          | B-value | OR 95% CI          | P value |
|-----------------|--------------|---------|--------------------|---------|
| <b>Cases</b>    |              |         |                    |         |
|                 | Up to 1 year | 0.944   | 2.57 (1.07–6.16)   | 0.034*  |
|                 | Male         | 1.83    | 6.57 (1.08–39.88)  | 0.041*  |
|                 | Female       | 1.33    | 3.80 (0.64–22.4)   | 0.141   |
|                 | 1–2 years    | 0       | 1.00 (0.35–2.85)   | 1       |
|                 | Male         | 0       | 1.00 (0.12–8.54)   | 1       |
|                 | Female       | 0       | 1.00 (0.12–8.28)   | 1       |
|                 | >2 years     |         | Reference category |         |
| <b>Controls</b> |              |         |                    |         |
|                 | Up to 1 year | 1.041   | 2.83 (1.12–7.19)   | 0.028*  |
|                 | Male         | 2.06    | 7.87 (1.1951.97)   | 0.032*  |
|                 | Female       | 1.77    | 5.91 (0.88–39.43)  | 0.067   |
|                 | 1–2 years    | 0.288   | 1.33 (0.46–3.84)   | 0.594   |
|                 | Male         | 0.71    | 2.03 (0.24–17.31)  | 0.516   |
|                 | Female       | 0.778   | 2.18 (0.25–18.71)  | 0.478   |
|                 | >2 years     |         | Reference category |         |

\*Statistically significant

doi:10.1371/journal.pone.0060622.t001

## Results

### Prevalence of ETBF

A total of 874 fecal specimens were analyzed in this study including 446 from diarrheal children and 428 from controls. The overall detection rate of ETBF was 7.2% (63 of 874) that prevailed evenly in cases and controls (7.2% each; 32 of 446 cases and 31 of 428 controls). ETBF was detected as the sole pathogen in 14 of 32 (44%) cases and 12 of 31(39%) controls. However, these results were not statistically significant. Thirty-five ETBF positive samples were associated with different enteric pathogens and equally found in cases and controls (57% each). Details of co-pathogens associated with ETBF are presented in Table 2.

Comparative analysis revealed that the detection rate of ETBF among the three age groups in both case and control were 18(9.3%), 7 (5.6%), 7 (5.6%) and 17 (10.1%), 8 (6.6%), 6 (4.3%), respectively for up to 1 years, >1–2 years and >2 years. There was no difference between cases and controls in the prevalence of ETBF. However, ETBF detection rate in male children under 1year of age group was significant ( $p<0.05$ ) in cases as well as controls as compared to >2 years of children (Table 1). By culture method, 30 (47.6%) ETBF isolates (16 and 14 from cases and controls, respectively) were identified from 63 stool DNA-direct PCR positive specimens and all the ETBF isolates were also positive in the species-specific 16S-rRNA PCR. Five ETBF isolates lost their viability during storage.

### ETBF subtypes

In the PCR-RFLP analysis, *bft-1* and *bft-3* alleles of the toxin encoding genes were identified among 25 ETBF isolates. There were no differences in the distribution of these alleles among

**Table 2.** Prevalence of ETBF as sole and with other pathogens in children with diarrhea and controls.

| Pathogen                                       | Case (n = 446) | Control (n = 428) |
|------------------------------------------------|----------------|-------------------|
| ETBF as a sole pathogen                        | 14             | 12                |
| Adenovirus                                     | 1              | 1                 |
| <i>C. difficile</i>                            | 2              | 1                 |
| <i>Campylobacter jejuni</i> and Adenovirus     | 1              |                   |
| <i>C. jejuni</i> and EPEC                      | 1              |                   |
| <i>C. jejuni</i> and Norovirus GII             | 1              |                   |
| <i>C. coli</i> , Adenovirus and <i>Giardia</i> |                | 1                 |
| EAEC                                           | 1              | 2                 |
| EAEC and Adenovirus                            | 1              |                   |
| EPEC                                           | 1              |                   |
| EPEC, Adeno virus and <i>Giardia</i>           |                | 1                 |
| EPEC, <i>H. pylori</i>                         |                | 1                 |
| <i>Giardia</i>                                 | 3              | 6                 |
| <i>Giardia</i> and Adenovirus                  |                | 1                 |
| <i>Giardia</i> , <i>Cryptosporidium</i>        |                | 1                 |
| <i>Giardia</i> , <i>H. pylori</i>              | 3              |                   |
| <i>Giardia</i> and Norovirus GII               |                | 1                 |
| <i>H. pylori</i>                               | 2              | 2                 |
| Norovirus GII                                  |                | 1                 |
| <i>Shigella spp</i>                            | 1              |                   |

doi:10.1371/journal.pone.0060622.t002

ETBF isolates from cases and controls (*bft-1* 40% and *bft-3* 60% in cases and controls, respectively).

### Antimicrobial susceptibility testing

Based on the MIC cut-off values, the antimicrobial testing results were categorized as resistant and susceptible. The ETBF isolates were uniformly susceptible to imipenem and chloramphenicol. The resistance frequencies to ampicillin, ampicillin/sulbactam, amoxicillin/potassium clavulanate, cefoxitin, clindamycin, ciprofloxacin, metronidazole, moxifloxacin, and norfloxacin remained 92, 48, 60, 8, 48, 88, 44, 32 and 92%, respectively.

### PFGE

PFGE was performed with ETBF isolated from 15 cases and 10 controls. The UPGMA based dendrogram displayed two major clades (A and B) containing 14 isolates with 75% homology (Fig. 1). Except two isolates in the clade B, majority of the ETBF remained genetically heterogeneous and there is no clear demarcation of ETBF isolated from cases and controls. However, majority of ETBF in clade B were isolated from diarrheal cases. In the clade A, of the 7 ETBF, 4 were from controls and resistant to 5–8 antimicrobials including metronidazole and moxifloxacin. ETBF isolates in the clade B were resistant for 1–5 antimicrobials but susceptible for metronidazole and moxifloxacin. In addition, all the isolates in clade B harbored *bft-3* (Fig.1).

### Discussion

In this study, *bft*-PCR assay was performed using the DNA extracted from the stools. The designed primers for *bft* amplifica-

tion cover all the three toxin genotypes. PCR assay for the detection of ETBF is more useful than culture method as the later needs prolonged anaerobic incubation followed by confirmation of the isolates. Of the 63 PCR positive specimens, culture results yielded 47.6% positivity for ETBF, with an overall isolation rate of 3.4%. In a previous study based on culture and *bft*-PCR from Goa, India showed that the detection rate of ETBF among the travelers with diarrhea was 13% [6]. In a study conducted in Kolkata by bacterial culture and toxin assay using tissue culture revealed that isolation rate of ETBF among acute diarrheal cases was 2.6% [12]. Similar to our results, low prevalence of ETBF was documented in Bangladesh (3–4%) and Brazil (2%) [21,22]. In the HT29/C1 cell assay and the PCR based detection method showed that the association of ETBF in cases and controls were not significant (Table 3).

In almost half the number of PCR-positive stools, we could not isolate ETBF, though we tested several typical *B. fragilis* colonies from each specimen. The recovery rate of *B. fragilis* would have been better if we used strict anaerobic conditions at the time of stool collection, transport and during processing. However, with the use of DNA based PCR assay, we could detect the ETBF almost two times more (7.2%) than the culture method. For the detection of ETBF, molecular based detection methods are very useful as the assays are sensitive, rapid and easier to perform. A real-time PCR approach may also be helpful for the rapid diagnosis of ETBF.

This study is the first of its kind as we examined the ETBF burden among young children in India. The prevalence rate of ETBF among diarrheal patients and asymptomatic controls from different countries are shown in Table 3. In accordance with

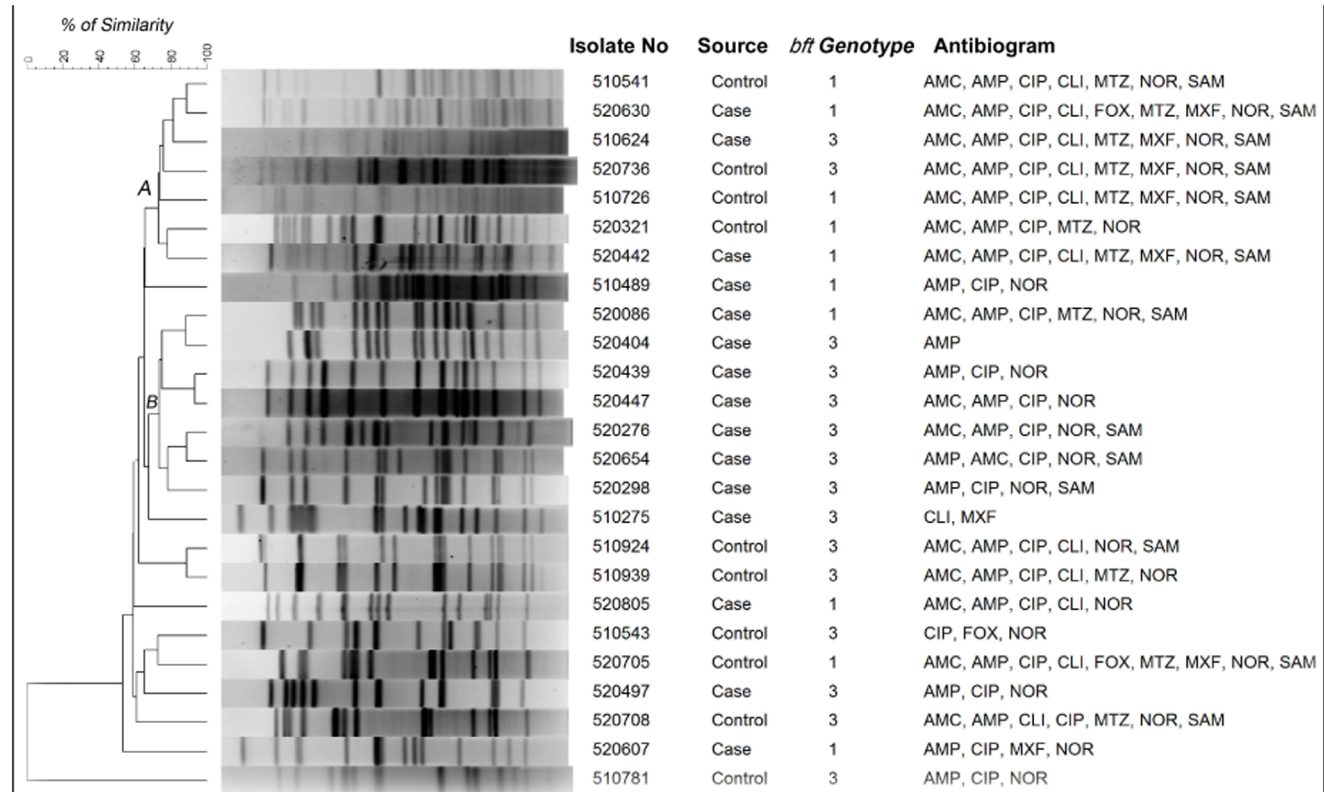

**Figure 1. *NotI* restriction patterns of genomic DNA of enterotoxigenic *B. fragilis* isolates.** The dendrogram was generated by using UPGAMA method.

doi:10.1371/journal.pone.0060622.g001

**Table 3.** Prevalence of enterotoxigenic *Bacteroides fragilis* in diarrheal cases and controls in different studies.

| Place                 | Prevalence of ETBE (%) |                   | Detection method | Remark     | <i>bft</i> genotype (%)                                      |                                          | Reference |
|-----------------------|------------------------|-------------------|------------------|------------|--------------------------------------------------------------|------------------------------------------|-----------|
|                       | Case                   | Control           |                  |            | Case                                                         | Control                                  |           |
| Bangladesh            | 22 (6.1) n = 358       | 5 (1.2) n = 425   | HT29/C1 assay    | p = 0.0001 | ND                                                           | ND                                       | [7]       |
| Apache and Bangladesh | 44 (4.4) n = 991       | 18 (3.1) n = 581  | HT29/C1 assay    | NS         | ND                                                           | ND                                       | [48]      |
| India                 | 6 (2.6) n = 226        | 3 (1.7) n = 172   | HT29/C1 assay    | NS         | ND                                                           | ND                                       | [12]      |
| Italy                 | 14 (21.5) n = 65       | 9 (6.9) n = 129   | HT29Cl assay     | NS         | ND                                                           | ND                                       | [24]      |
| Bangladesh            | 28 (3.5) n = 814       | 12 (1.5) n = 814  | HT29/C1 assay    | p = 0.01   | ND                                                           | ND                                       | [21]      |
| Sweden                | 195 (26.8) n = 728     | 24 (12.4) n = 194 | HT29/C1 assay    | NS         | ND                                                           | ND                                       | [28]      |
| Brazil                | 2 (2.1) n = 96         | 0 n = 74          | HT29/C1 assay    | NS         | ND                                                           | ND                                       | [22]      |
| Bangladesh            | 40 (2.3) n = 1750      | 15 (0.3) n = 5679 | HT29/C1 assay    | p = 0.001  | ND                                                           | ND                                       | [30]      |
| Vietnam               | 43 (7.3) n = 587       | 6 (2.4) n = 249   | Immuno and PCR   | p = 0.01   | <i>Bft-1</i> (67.4), <i>Bft-2</i> (18.6) <i>Bft-3</i> (16.0) | <i>Bft-2</i> (83.0), <i>Bft-2</i> (17.0) | [27]      |
| Turkey                | 13 (11.0) n = 117      | 8 (7.8) n = 102   | PCR              | p = 0.05   | ND                                                           | ND                                       | [25]      |
| Turkey                | 28 (38.0) n = 73       | 7 (12.0) n = 59   | PCR              | p = 0.009  | ND                                                           | ND                                       | [34]*     |
| Turkey                | 29 (15.0) n = 200      | 27 (14.0) n = 200 | PCR              | NS         | <i>Bft-1</i> (82.7), <i>Bft-2</i> (17.3)                     | <i>Bft-1</i> (88.9), <i>Bft-2</i> (11.1) | [23]      |
| Brazil                | 9 (8.2) n = 110        | 7 (4.7) n = 150   | Real time PCR    | NS         | <i>Bft-1</i> (8.2), <i>Bft-3</i> (0.9)                       | <i>Bft-1</i> (4.7)                       | [46]      |

Abbreviations: ND, not done; NS, not significant. \* Study with colorectal cancer patients  
doi:10.1371/journal.pone.0060622.t003

studies conducted in Turkey and Italy, the prevalence of ETBF in Kolkata was almost equal in children with diarrhea and controls [23,24]. However, reports from Vietnam, Turkey, Apache Indians in USA and Bangladesh, showed that the prevalence of ETBF was significantly high in cases and controls [25–27]. The highest prevalence of ETBF has been documented in countries such as Turkey (25%), Sweden (23%), Italy (17%), and in apache region of Arizona-USA (12%).

Overall, the prevalence of ETBF was the same in both cases and controls. However, considering the sole infection status, ETBF was comparatively identified more in cases (44%; 14/32) than in controls (39%; 12/31). In the investigations carried out in Bangladesh, Sweden, Turkey, Japan and Nicaragua, ETBF was detected as the only pathogen from 39 to 88% of the diarrheal cases [9,25,28,29]. These findings support the view that there must be specific geographical difference in the prevalence of ETBF. In addition, findings from several countries show that ETBF significantly high in children with older age group [7,9,30]. Our findings show that ETBF was more frequently found in children less than 1 year age group (Table 1).

Polymicrobial etiology in diarrheal cases is a common trend in many endemic regions [31,32]. We observed that the co-infection rate of ETBF with other pathogens was 4% in children with diarrhea, which is almost similar to the findings from Vietnam [27] or with higher age group patients from Bangladesh and Turkey [7,23]. The significantly associated pathogens found with ETBF include enteropathogenic *E. coli* (EPEC), *Shigella* spp, *Campylobacter* spp., *Salmonella* spp., *Clostridium difficile*, *Entamoeba histolytica*, *Cryptosporidium*, *Giardia* spp. Rota virus and Adeno virus [7,25,27,28]. Although we screened for all these pathogens, we found no significant association between ETBF and other pathogens.

Three different genotypes of *bft* have been documented in the ETBF and detection of these genetic signatures is useful in assessing the severity of the infection. Although the BFT has similar biological activity, their toxicity seems to differ based on its genotype. The purified BFT-2 elucidated higher biological activity

than the other two genotypes [9,10]. In addition, the *bft-2* allele harboring ETBF colonize well in the intestines of children than in adults [33] and exhibit antibiotic associated diarrhea [9]. In this study, majority of the ETBF isolates harbored the *bft-3* allele than *bft-1* and none had the *bft-2* allele. ETBF harboring the *bft-1* allele has been reported from many countries (Table 3) [9,23,34]. In Turkey, in addition to *bft-1*, *bft-2* allele was also identified in ETBF from diarrheal children and adults [23]. In Japan and Korea, prevalence of ETBF harboring *bft-3* was reported in septicemia and diarrheal cases [9,16] but this allele is rarely found in European countries [10,33,35]. We identified *bft-3* predominantly in diarrheal cases and controls in Kolkata and perhaps this is the first report on the prevalence of *bft-3* in Southeast Asia region.

Although ETBF causes self-limiting diarrhea, antimicrobial therapy is recommended to reduce the possibility of imminent extraintestinal complications. Despite antibiotic therapy, intestinal inflammation caused by ETBF may persist for about 3 weeks [15]. Several antimicrobial susceptibility studies have been documented with clinically isolated *B. fragilis* [36–38] but only few reports exist on ETBF [34,39,40]. Moxifloxacin alone or in combination with metronidazole is advocated for the empirical treatment of infections caused by Gram-negative anaerobes [41]. In addition, cefoxitin, clindamycin, and carbapenems are recommended for anaerobic infections. Recently, acquisition of resistance by *B. fragilis* to many of these antimicrobials has been documented [42]. To generate basic information on resistance nature of ETBF, we have used E-test method in this study, as this assay has been adopted for many anaerobes [19,43]. We found that the ETBF are susceptible for chloramphenicol, and imipenem, but resistant to moxifloxacin and clindamycin. In addition, only 8 and 44% of the isolates are resistant to cefoxitin and metronidazole, respectively. Studies from in Brazil and Poland have documented that majority of the ETBF produced beta-lactamase, but susceptible for amoxicillin/clavulanic acid, imipenem and metronidazole [34,44]. Rarely, some of the *B. fragilis* isolates from human stools were resistant for clindamycin and cefoxitin [39].

In the PFGE, the metronidazole and moxifloxacin susceptible and resistant ETBF isolates are clustered into two distinct groups. Overall, the PFGE results with ETBF isolates showed that they are genetically distinct. This trend seems to be common in many countries [39,45]. Though we have identified many ETBF harboring *bft-1* and *bft-3* in this study, they are genetically different as evidenced from the PFGE. It is well known that in some bacterial species such as *Campylobacter jejuni*, diarrheagenic *E. coli* etc., the genetic constitution is largely diverse and hence the clonality of isolates in any given area may vary extensively.

## Conclusion

This study highlights the prevalence of ETBF in children without any significant association with diarrheal cases or in controls. However, ETBF was significantly detected in male children younger than one year of age group compared to >2

years group. Overall, ETBF was predominantly detected as a co-pathogen along with enteric parasites and viruses. The *bft-3* genotype was mostly seen than *bft-1*, without any specific age groups or the specimen category. Antimicrobial susceptibility results showed that all the ETBF isolates were susceptible to chloramphenicol, imipenem. Resistance of ETBF for clindamycin, moxifloxacin and metronidazole seems to be an emerging trend. Majority of the isolates are genetically heterogeneous as detected in the PFGE. More controlled long-term studies are required to prove the role of ETBF as an etiological agent for diarrhea.

## Author Contributions

Conceived and designed the experiments: TR. Performed the experiments: DR GPP AS RKN. Analyzed the data: KR BM RKN. Contributed reagents/materials/analysis tools: DS. Wrote the paper: TR.

## References

- Claros MC, Claros ZC, Hecht DW, Citron DM, Goldstein EJ, et al. (2006) Characterization of the *Bacteroides fragilis* pathogenicity island in human blood culture isolates. *Anaerobe* 12: 17–22.
- Pamer EG (2007) Immune responses to commensal and environmental microbes. *Nature Immunology* 8: 1173–1178.
- Balamurugan R, Janardhan HP, George S, Raghava MV, Muliyl J, et al. (2008) Molecular studies of fecal anaerobic commensal bacteria in acute diarrhea in children. *Journal of Pediatric Gastroenterology and Nutrition* 46: 514–519.
- Lalitha MK, Koshi G (1980) *Bacteroides* in clinical infections. *Indian Journal of Medical Research* 71: 701–707.
- Hill DR, Beeching NJ (2010) Travelers' diarrhea. *Current Opinion in Infectious Diseases* 23: 481–487.
- Jiang ZD, Dupont HL, Brown EL, Nandy RK, Ramamurthy T, et al. (2010) Microbial etiology of travelers' diarrhea in Mexico, Guatemala, and India: importance of enterotoxigenic *Bacteroides fragilis* and *Arcobacter* species. *Journal of Clinical Microbiology* 48: 1417–1419.
- Sack RB, Albert MJ, Alam K, Neogi PK, Akbar MS (1994) Isolation of enterotoxigenic *Bacteroides fragilis* from Bangladeshi children with diarrhea: a controlled study. *Journal of Clinical Microbiology* 32: 960–963.
- Cohen SH, Shetab R, Tang-Feldman YJ, Sarma P, Silva J Jr, et al. (2006) Prevalence of enterotoxigenic *Bacteroides fragilis* in hospital-acquired diarrhea. *Diagnostic Microbiology and Infectious Disease* 55: 251–254.
- Kato N, Liu CX, Kato H, Watanabe K, Tanaka Y, et al. (2000) A new subtype of the metalloprotease toxin gene and the incidence of the three *bft* subtypes among *Bacteroides fragilis* isolates in Japan. *FEMS Microbiology Letters* 182: 171–176.
- Sears CL (2009) Enterotoxigenic *Bacteroides fragilis*: a rogue among symbiotes. *Clinical Microbiology Reviews* 22: 349–369.
- Wick EC, Sears CL (2010) *Bacteroides* spp. and diarrhea. *Current Opinion in Infectious Diseases* 23: 470–474.
- Niyogi SK, Dutta P, Mitra U, Pal DK (1997) Association of enterotoxigenic *Bacteroides fragilis* with childhood diarrhoea. *Indian Journal of Medical Research* 105: 167–169.
- Panchalingam S, Antonio M, Hossain A, Mandomando I, Ochieng B, et al. (2012) Diagnostic Microbiology Methods in the GEMS-1 Case/Control Study. *Clinical Infectious Diseases* 4: S294–302.
- Matsuki T, Watanabe K, Fujimoto J, Miyamoto Y, Takada T, et al. (2002) Development of 16S rRNA-gene-targeted group-specific primers for the detection and identification of predominant bacteria in human feces. *Applied Environmental Microbiology* 68: 5445–5451.
- Sears CL, Islam S, Saha A, Arjumand M, Alam NH, et al. (2008) Association of enterotoxigenic *Bacteroides fragilis* infection with inflammatory diarrhea. *Clinical Infectious Diseases* 47:797–803.
- Chung GT, Franco AA, Wu S, Rhie GE, Cheng R, et al. (1999) Identification of a third metalloprotease toxin gene in extraintestinal isolates of *Bacteroides fragilis*. *Infection and Immunity* 67:4945–4949.
- CLSI (2009) Performance standards for antimicrobial susceptibility testing of anaerobic bacteria; informational supplement M11–S1.
- Rennie RP, Turnbull L, Brosnikoff C, Cloke J (2012) First comprehensive evaluation of the M.I.C. evaluator device compared to Etest and CLSI reference dilution methods for antimicrobial susceptibility testing of clinical strains of anaerobes and other fastidious bacterial species. *Journal of Clinical Microbiology* 50: 1153–1157.
- Rosenblatt JE, Gustafson DR (1995) Evaluation of the Etest for susceptibility testing of anaerobic bacteria. *Diagnostic Microbiology and Infectious Disease* 22: 279–284.
- Yamasaki S, Nair GB, Bhattacharya SK, Yamamoto S, Kurazono H, et al. (1997) Cryptic appearance of a new clone of *Vibrio cholerae* serogroup O1 biotype El Tor in Calcutta, India. *Microbiology and Immunology* 41: 1–6.
- Albert MJ, Faruque AS, Faruque SM, Sack RB, Mahalanabis D (1999) Case-control study of enteropathogens associated with childhood diarrhea in Dhaka, Bangladesh. *Journal of Clinical Microbiology* 37: 3458–3464.
- Krzyzanowski F, Avila-Campos MJ (2003) Detection of non-enterotoxigenic and enterotoxigenic *Bacteroides fragilis* in stool samples from children in São Paulo, Brazil. *Revista do Instituto de Medicina Tropical de São Paulo* 45: 225–227.
- Akpınar M, Aktaş E, Cömert F, Külah C, Sümbüloğlu V (2010) Evaluation of the prevalence of enterotoxigenic *Bacteroides fragilis* and the distribution *bft* gene subtypes in patients with diarrhea. *Anaerobe* 6: 505–509.
- Pantosti A, Menozzi MG, Frate A, Sanfilippo L, D'Ambrosio F, et al. (1997) Detection of enterotoxigenic *Bacteroides fragilis* and its toxin in stool samples from adults and children in Italy. *Clinical Infectious Diseases* 24:12–16.
- Durmaz B, Dalgalar M, Durmaz R (2005) Prevalence of enterotoxigenic *Bacteroides fragilis* in patients with diarrhea: a controlled study. *Anaerobe* 11: 318–321.
- Sack RB, Myers LL, Almeida-Hill J, Shoop DS, Bradbury WC, et al. (1992) Enterotoxigenic *Bacteroides fragilis*: epidemiologic studies of its role as a human diarrhoeal pathogen. *Journal of Diarrhoeal Diseases Research*. 1992;10: 4–9.
- Vu Nguyen T, Le Van P, Le Huy C, Weintraub A (2005) Diarrhea caused by enterotoxigenic *Bacteroides fragilis* in children less than 5 years of age in Hanoi, Vietnam. *Anaerobe* 11: 109–114.
- Zhang G, Svenungsson B, Kärmel A, Weintraub A (1999) Prevalence of enterotoxigenic *Bacteroides fragilis* in adult patients with diarrhea and healthy controls. *Clinical Infectious Diseases* 29: 590–594.
- Caceres M, Zhang G, Weintraub A, Nord CE (2000) Prevalence and antimicrobial susceptibility of enterotoxigenic *Bacteroides fragilis* in children with diarrhea in Nicaragua. *Anaerobe* 6: 143–148.
- Pathela P, Hasan KZ, Roy E, Alam K, Huq F, et al. (2005) Enterotoxigenic *Bacteroides fragilis*-associated diarrhea in children 0–2 years of age in rural Bangladesh. *Journal of Infectious Diseases* 191: 1245–1252.
- Nair GB, Ramamurthy T, Bhattacharya MK, Krishnan T, Ganguly S, et al. (2010) Emerging trends in the etiology of enteric pathogens as evidenced from an active surveillance of hospitalized diarrhoeal patients in Kolkata, India. *Gut Pathogens* 2: 4.
- Nimri LF, Elnasser Z, Batchoun R (2004) Polymicrobial infections in children with diarrhoea in a rural area of Jordan. *FEMS Immunology and Medical Microbiology* 42: 255–259.
- Scotto d'Abusco AS, Del Grosso M, Censini S, Covacci A, Pantosti A (2000) The alleles of the *bft* gene are distributed differently among enterotoxigenic *Bacteroides fragilis* strains from human sources and can be present in double copies. *Journal of Clinical Microbiology* 38: 607–612.
- Toprak NU, Yagci A, Gulluoglu BM, Akin ML, Demirkalem P, et al. (2006) A possible role of *Bacteroides fragilis* enterotoxin in the aetiology of colorectal cancer. *Clinical Microbiology and Infection* 12: 782–786.
- Ulger Toprak N, Rajendram D, Yagci A, Gharbia S, Shah HN, et al. (2006) The distribution of the *bft* alleles among enterotoxigenic *Bacteroides fragilis* strains from stool specimens and extraintestinal sites. *Anaerobe* 12: 71–74.
- Chaudhry R, Mathur P, Dhawan B, Kumar L (2001) Emergence of metronidazole-resistant *Bacteroides fragilis*, India. *Emerging Infectious Diseases* 7: 485–486.
- Lee Y, Park Y, Kim MS, Yong D, Jeong SH, et al. (2010) Antimicrobial susceptibility patterns for recent clinical isolates of anaerobic bacteria in South Korea. *Antimicrobial Agents and Chemotherapy* 54: 3993–3997.
- Paula GR, Falcão LS, Antunes EN, Avelar KE, Reis FN, et al. (2004) Determinants of resistance in *Bacteroides fragilis* strains according to recent Brazilian profiles of antimicrobial susceptibility. *International Journal of Antimicrobial Agents* 24: 53–58.

39. Obuch-Woszczatyński P, Wintermans RG, Van Belkum A, Endtz H, Pituch H, et al. (2004) Enterotoxigenic *Bacteroides fragilis* (ETBF) strains isolated in The Netherlands and Poland are genetically diverse. *Polish Journal of Microbiology* 53: 35–39.
40. Rokosz A, Sawicka-Grzelak A, Kot K, Meszaros J, Łuczak M (2001) Use of the Etest method for antimicrobial susceptibility testing of obligate anaerobes. *Medycyna Doswiadczalna i Mikrobiologia* 53: 167–175.
41. Papaparaskevas J, Pantazatou A, Katsandri A, Houhoula DP, Legakis NJ, et al. (2008) Moxifloxacin resistance is prevalent among *Bacteroides* and *Prevotella* species in Greece. *Journal of Antimicrobial Chemotherapy* 62: 137–141.
42. Wexler HM (2007) Bacteroides: the good, the bad, and the nitty-gritty. *Clinical Microbiology Reviews* 20: 593–621.
43. Galvão BP, Meggersee RL, Abratt VR (2011) Antibiotic resistance and adhesion potential of *Bacteroides fragilis* clinical isolates from Cape Town, South Africa. *Anaerobe* 17: 142–146.
44. Nakano V, Padilla G, do Valle Marques M, Avila-Campos MJ (2004) Plasmid-related beta-lactamase production in *Bacteroides fragilis* strains. *Research in Microbiology* 155: 843–846.
45. Antunes EN, Ferreira EO, Falcão LS, Paula GR, Avelar KE, et al. (2004) Non-toxicogenic pattern II and III *Bacteroides fragilis* strains: coexistence in the same host. *Research in Microbiology* 155: 522–524.
46. Merino VR, Nakano V, Liu C, Song Y, Finegold SM, et al. (2011). Quantitative detection of enterotoxigenic *Bacteroides fragilis* subtypes isolated from children with and without diarrhea. *Journal of Clinical Microbiology* 49: 416–418.
47. San Joaquin VH, Griffis JC, Lee C, Sears CL (1995) Association of *Bacteroides fragilis* with childhood diarrhea. *Scandinavian Journal of Infectious Diseases* 27: 211–215.
